# Supplementary material for: Seesaw conformations of Npl4 in the human p97 complex and the inhibitory mechanism of a disulfiram derivative
Source: PubMed Central journal article supplement (PMC7785736; doi:10.1038/s41467-020-20359-x), 2021-01-05
Supplement: 41467_2020_20359_MOESM3_ESM.pdf [file 41467_2020_20359_MOESM3_ESM.pdf]

## Reporting Summary

Nature Research wishes to improve the reproducibility of the work that we publish. This form provides structure for consistency and transparency in reporting. For further information on Nature Research policies, see [Authors & Referees](#) and the [Editorial Policy Checklist](#).

### Statistics

For all statistical analyses, confirm that the following items are present in the figure legend, table legend, main text, or Methods section.

n/a Confirmed

- |                                     |                                     |                                                                                                                                                                                                                                                            |
|-------------------------------------|-------------------------------------|------------------------------------------------------------------------------------------------------------------------------------------------------------------------------------------------------------------------------------------------------------|
| <input checked="" type="checkbox"/> | <input type="checkbox"/>            | The exact sample size ( $n$ ) for each experimental group/condition, given as a discrete number and unit of measurement                                                                                                                                    |
| <input checked="" type="checkbox"/> | <input type="checkbox"/>            | A statement on whether measurements were taken from distinct samples or whether the same sample was measured repeatedly                                                                                                                                    |
| <input checked="" type="checkbox"/> | <input type="checkbox"/>            | The statistical test(s) used AND whether they are one- or two-sided<br><i>Only common tests should be described solely by name; describe more complex techniques in the Methods section.</i>                                                               |
| <input checked="" type="checkbox"/> | <input type="checkbox"/>            | A description of all covariates tested                                                                                                                                                                                                                     |
| <input checked="" type="checkbox"/> | <input type="checkbox"/>            | A description of any assumptions or corrections, such as tests of normality and adjustment for multiple comparisons                                                                                                                                        |
| <input type="checkbox"/>            | <input checked="" type="checkbox"/> | A full description of the statistical parameters including central tendency (e.g. means) or other basic estimates (e.g. regression coefficient) AND variation (e.g. standard deviation) or associated estimates of uncertainty (e.g. confidence intervals) |
| <input type="checkbox"/>            | <input checked="" type="checkbox"/> | For null hypothesis testing, the test statistic (e.g. $F$ , $t$ , $r$ ) with confidence intervals, effect sizes, degrees of freedom and $P$ value noted<br><i>Give <math>P</math> values as exact values whenever suitable.</i>                            |
| <input checked="" type="checkbox"/> | <input type="checkbox"/>            | For Bayesian analysis, information on the choice of priors and Markov chain Monte Carlo settings                                                                                                                                                           |
| <input checked="" type="checkbox"/> | <input type="checkbox"/>            | For hierarchical and complex designs, identification of the appropriate level for tests and full reporting of outcomes                                                                                                                                     |
| <input checked="" type="checkbox"/> | <input type="checkbox"/>            | Estimates of effect sizes (e.g. Cohen's $d$ , Pearson's $r$ ), indicating how they were calculated                                                                                                                                                         |

*Our web collection on [statistics for biologists](#) contains articles on many of the points above.*

### Software and code

Policy information about [availability of computer code](#)

|                 |                                                                                                                                                                                                                                   |
|-----------------|-----------------------------------------------------------------------------------------------------------------------------------------------------------------------------------------------------------------------------------|
| Data collection | <input type="text" value="Latitude S"/>                                                                                                                                                                                           |
| Data analysis   | <input type="text" value="MotionCor2 1.3.1, Relion 3.0.8, Ctffind4 4.1.10, ResMap 1.95, PyMol 2.2.3, Phenix 1.17.1, Chimera 1.13, ChimeraX 1.0, GraphPad Prism 8.2.1, ImageJ 2.0.0 (Fiji), OriginPro 2019b, Coot 0.9.1, CIMAGE"/> |

For manuscripts utilizing custom algorithms or software that are central to the research but not yet described in published literature, software must be made available to editors/reviewers. We strongly encourage code deposition in a community repository (e.g. GitHub). See the Nature Research [guidelines for submitting code & software](#) for further information.

### Data

Policy information about [availability of data](#)

All manuscripts must include a [data availability statement](#). This statement should provide the following information, where applicable:

- Accession codes, unique identifiers, or web links for publicly available datasets
- A list of figures that have associated raw data
- A description of any restrictions on data availability

cryo-EM maps have been deposited in the Electron Microscopy Data Bank (EMDB) under the accession codes EMD-21824 [<https://www.emdataresource.org/EMD-21824>] (p97-Npl4/Ufd1, State I), EMD-21825 [<https://www.emdataresource.org/EMD-21825>] (p97-Npl4/Ufd1, State II), EMD-21826 [<https://www.emdataresource.org/EMD-21826>] (p97-Npl4/Ufd1, State III), EMD-21827 [<https://www.emdataresource.org/EMD-21827>] (p97-Npl4/Ufd1-UbEos, State I), EMD-21828 [<https://www.emdataresource.org/EMD-21828>] (p97-Npl4/Ufd1-UbEos, State II), EMD-21829 [<https://www.emdataresource.org/EMD-21829>] (p97-Npl4/Ufd1-UbEos, State III), EMD-21830 [<https://www.emdataresource.org/EMD-21830>] (p97-Npl4/Ufd1 in the presence of cupric ion), and EMD-22521 [<https://www.emdataresource.org/EMD-22521>] (p97-Npl4/Ufd1, masked around p97 and applied C6 symmetry). The atomic model of p97 bound to ATP $\gamma$ S has been deposited in the Protein Data Bank (PDB) under the accession code 7JY5 [<https://www.rcsb.org/structure/unreleased/7JY5>]. Source data are provided with this paper.

## Field-specific reporting

Please select the one below that is the best fit for your research. If you are not sure, read the appropriate sections before making your selection.

- Life sciences       Behavioural & social sciences       Ecological, evolutionary & environmental sciences

For a reference copy of the document with all sections, see [nature.com/documents/nr-reporting-summary-flat.pdf](https://www.nature.com/documents/nr-reporting-summary-flat.pdf)

## Life sciences study design

All studies must disclose on these points even when the disclosure is negative.

|                 |                                                                                                                                                                                                                                                                                                                                                        |
|-----------------|--------------------------------------------------------------------------------------------------------------------------------------------------------------------------------------------------------------------------------------------------------------------------------------------------------------------------------------------------------|
| Sample size     | All experiments involving tissue culture were performed in three or four independent culture preparations.                                                                                                                                                                                                                                             |
| Data exclusions | No data was excluded.                                                                                                                                                                                                                                                                                                                                  |
| Replication     | Three or four independent biological replications were performed for the cell viability assays, quantification of intracellular copper level, and quantification of oxidatively modified proteins after tBHP treatment. Three technical replicates were performed for the substrate unfolding assay to estimate reading errors of fluorescent signals. |
| Randomization   | Randomization is not relevant to this study.                                                                                                                                                                                                                                                                                                           |
| Blinding        | Blinding is not relevant to this study.                                                                                                                                                                                                                                                                                                                |

## Reporting for specific materials, systems and methods

We require information from authors about some types of materials, experimental systems and methods used in many studies. Here, indicate whether each material, system or method listed is relevant to your study. If you are not sure if a list item applies to your research, read the appropriate section before selecting a response.

### Materials & experimental systems

| n/a                                 | Included in the study                                     |
|-------------------------------------|-----------------------------------------------------------|
| <input checked="" type="checkbox"/> | <input type="checkbox"/> Antibodies                       |
| <input type="checkbox"/>            | <input checked="" type="checkbox"/> Eukaryotic cell lines |
| <input checked="" type="checkbox"/> | <input type="checkbox"/> Palaeontology                    |
| <input checked="" type="checkbox"/> | <input type="checkbox"/> Animals and other organisms      |
| <input checked="" type="checkbox"/> | <input type="checkbox"/> Human research participants      |
| <input checked="" type="checkbox"/> | <input type="checkbox"/> Clinical data                    |

### Methods

| n/a                                 | Included in the study                           |
|-------------------------------------|-------------------------------------------------|
| <input checked="" type="checkbox"/> | <input type="checkbox"/> ChIP-seq               |
| <input checked="" type="checkbox"/> | <input type="checkbox"/> Flow cytometry         |
| <input checked="" type="checkbox"/> | <input type="checkbox"/> MRI-based neuroimaging |

## Eukaryotic cell lines

Policy information about [cell lines](#)

|                                                                      |                                                                                                                                                                                                                                |
|----------------------------------------------------------------------|--------------------------------------------------------------------------------------------------------------------------------------------------------------------------------------------------------------------------------|
| Cell line source(s)                                                  | Hela cells (ATCC CCL-2) were kindly provided by Dr. Chuan He at University of Chicago and originally from ATCC. A549 cells (ATCC CCL-185) were a gift from Dr. Eileen Dolan at University of Chicago and originally from ATCC. |
| Authentication                                                       | None of the cell lines used were authenticated.                                                                                                                                                                                |
| Mycoplasma contamination                                             | Mycoplasma were tested by PCR-based method and no mycoplasma contamination were detected in all cell lines used.                                                                                                               |
| Commonly misidentified lines<br>(See <a href="#">ICLAC</a> register) | No commonly misidentified lines were used in the study.                                                                                                                                                                        |
